# Supplementary material for: The trade-off between graduate student research and teaching: A myth?
Source: PLoS One. 2018 Jun 25;13(6):e0199576. doi: 10.1371/journal.pone.0199576 (PMC6016899; doi:10.1371/journal.pone.0199576)
Supplement: S3 Fig — (CSV) [file pone.0199576.s003.csv]

	ID	SciComm	ResAdq	TrnSC	TASupport	MastersDg	YrPrgm	Pubs
2	82	10	7	7	0	Bachelors	6thYr+	1
5	454	12	13	10	50	Bachelors	2ndYr	2+
6	36	11	6	1	0	Bachelors	4thYr	1
7	129	8	10	2	12	Bachelors	5thYr	1
8	11	6	7	4	50	Bachelors	2ndYr	1
11	420	9	10	2	18	Bachelors	5thYr	1
13	518	10	11	0	75	Bachelors	4thYr	0
14	252	10	11	1	25	Bachelors	2ndYr	1
15	539	8	11	10	49	Bachelors	6thYr+	2+
16	462	8	13	4	83	Bachelors	4thYr	1
17	45	12	9	3	10	Bachelors	6thYr+	2+
19	382	7	12	6	20	Bachelors	6thYr+	2+
20	3	6	4	0	0	Bachelors	2ndYr	1
21	495	10	12	5	0	Bachelors	3rdYr	1
22	204	10	16	2	0	Bachelors	3rdYr	2+
26	56	7	13	3	0	Bachelors	2ndYr	0
28	199	10	14	3	0	Bachelors	2ndYr	0
31	357	10	9	6	20	Bachelors	4thYr	2+
33	438	9	12	8	75	Bachelors	3rdYr	0
34	464	11	12	10	48	Bachelors	2ndYr	1
35	490	8	10	4	0	Bachelors	3rdYr	1
36	522	7	5	1	80	Bachelors	2ndYr	0
39	50	10	10	3	50	Bachelors	3rdYr	0
43	436	7	13	7	0	Bachelors	3rdYr	0
44	441	10	11	3	0	Bachelors	2ndYr	1
53	79	7	13	3	0	Bachelors	2ndYr	0
55	146	10	12	1	67	Bachelors	3rdYr	0
56	197	7	11	1	0	Bachelors	4thYr	0
58	269	10	13	3	70	Bachelors	6thYr+	2+
61	69	11	9	6	37	Bachelors	3rdYr	2+
64	88	11	12	4	30	Bachelors	5thYr	2+
66	277	7	13	2	35	Bachelors	3rdYr	0
67	330	8	12	5	25	Bachelors	3rdYr	0
68	447	11	9	1	100	Bachelors	3rdYr	0
69	451	11	13	7	79	Bachelors	2ndYr	0
70	479	9	10	2	100	Bachelors	6thYr+	2+
71	532	9	14	11	50	Bachelors	2ndYr	0
73	9	6	10	0	0	Bachelors	4thYr	0
74	10	12	14	3	92	Bachelors	5thYr	2+
75	20	9	6	0	16	Bachelors	3rdYr	0
78	48	11	13	0	0	Bachelors	2ndYr	0
79	59	6	14	0	0	Bachelors	3rdYr	0
81	91	12	12	8	0	Bachelors	4thYr	2+
85	118	9	13	4	0	Bachelors	5thYr	0
86	119	11	13	3	15	Bachelors	4thYr	2+
88	131	5	4	1	33	Bachelors	5thYr	1
89	132	9	9	2	0	Bachelors	2ndYr	0
90	133	8	14	1	40	Bachelors	3rdYr	0
91	135	10	11	1	80	Bachelors	2ndYr	1
92	150	11	12	0	0	Bachelors	2ndYr	0
93	152	12	8	4	81	Bachelors	2ndYr	0
95	158	6	14	1	85	Bachelors	3rdYr	0
96	168	10	14	1	100	Bachelors	3rdYr	1
98	198	6	6	0	81	Bachelors	4thYr	1
100	210	8	9	0	0	Bachelors	6thYr+	0
101	225	7	9	2	10	Bachelors	4thYr	0
104	249	10	10	0	14	Bachelors	5thYr	1
106	272	10	7	1	100	Bachelors	3rdYr	0
108	295	12	10	5	25	Bachelors	6thYr+	1
111	309	12	16	6	20	Bachelors	5thYr	2+
112	329	7	11	0	10	Bachelors	5thYr	0
113	337	9	9	7	20	Bachelors	6thYr+	2+
114	348	11	13	5	0	Bachelors	4thYr	0
116	379	12	14	2	14	Bachelors	6thYr+	0
117	399	9	9	5	25	Bachelors	3rdYr	1
119	409	8	14	2	0	Bachelors	2ndYr	0
120	411	8	12	1	0	Bachelors	2ndYr	0
122	445	11	12	7	0	Bachelors	2ndYr	0
124	461	8	13	3	10	Bachelors	5thYr	2+
125	466	11	9	3	75	Bachelors	4thYr	0
126	481	8	15	2	0	Bachelors	3rdYr	1
127	482	9	7	8	0	Bachelors	4thYr	0
132	559	12	11	9	20	Bachelors	4thYr	1
133	334	12	11	8	100	Bachelors	3rdYr	1
134	38	10	12	2	0	Bachelors	3rdYr	0
136	159	7	9	2	40	Bachelors	3rdYr	1
138	263	9	16	1	5	Bachelors	2ndYr	0
139	264	12	12	1	79	Bachelors	5thYr	1
140	281	11	15	4	50	Bachelors	2ndYr	0
141	332	11	12	12	51	Bachelors	6thYr+	2+
142	402	10	15	7	0	Bachelors	3rdYr	1
143	550	8	9	4	0	Bachelors	6thYr+	1
145	145	8	12	0	25	Bachelors	4thYr	0
147	458	10	10	7	50	Bachelors	6thYr+	1
154	42	9	8	1	0	Bachelors	2ndYr	0
158	72	8	7	2	70	Bachelors	6thYr+	0
161	139	9	13	2	70	Bachelors	4thYr	1
165	187	11	12	1	60	Bachelors	3rdYr	0
166	188	8	10	2	60	Bachelors	5thYr	0
173	238	8	12	3	25	Bachelors	4thYr	0
179	331	9	13	3	20	Bachelors	4thYr	0
182	346	12	15	6	0	Bachelors	2ndYr	0
183	349	11	16	12	36	Bachelors	6thYr+	1
185	367	10	11	4	70	Bachelors	5thYr	0
186	373	11	5	1	30	Bachelors	4thYr	0
187	375	9	14	4	21	Bachelors	4thYr	0
189	385	7	13	9	51	Bachelors	6thYr+	1
191	392	10	11	4	35	Bachelors	4thYr	1
192	394	9	14	4	12	Bachelors	4thYr	2+
195	401	9	10	7	30	Bachelors	6thYr+	1
196	406	8	15	6	0	Bachelors	2ndYr	0
197	423	12	14	13	0	Bachelors	4thYr	2+
198	427	9	12	7	70	Bachelors	3rdYr	1
200	431	9	12	3	70	Bachelors	5thYr	1
201	440	10	12	2	33	Bachelors	6thYr+	0
202	446	10	11	3	40	Bachelors	2ndYr	0
203	455	6	10	2	42	Bachelors	6thYr+	0
205	476	8	12	4	8	Bachelors	5thYr	0
210	516	9	12	11	97	Bachelors	2ndYr	0
211	540	10	15	12	65	Bachelors	4thYr	1
213	548	7	14	9	80	Bachelors	5thYr	1
215	153	7	5	6	49	Bachelors	6thYr+	2+
216	253	6	NA	1	50	Bachelors	2ndYr	0
218	328	9	NA	2	94	Bachelors	4thYr	0
220	374	9	12	6	65	Bachelors	2ndYr	0
221	414	8	10	1	72	Bachelors	2ndYr	0
222	504	9	8	1	73	Bachelors	6thYr+	1
223	542	9	16	1	8	Bachelors	2ndYr	1
227	292	9	10	2	30	Bachelors	6thYr+	2+
228	297	12	12	NA	65	Bachelors	2ndYr	0
233	35	11	12	1	60	Bachelors	3rdYr	0
235	110	10	15	1	22	Bachelors	3rdYr	2+
236	144	9	11	1	25	Bachelors	5thYr	0
238	156	11	11	2	33	Bachelors	3rdYr	0
239	161	3	7	1	50	Bachelors	3rdYr	1
241	170	7	6	8	45	Bachelors	5thYr	0
242	171	8	11	9	30	Bachelors	5thYr	1
243	217	8	12	3	33	Bachelors	3rdYr	2+
244	218	9	10	2	50	Bachelors	3rdYr	1
246	247	10	12	0	17	Bachelors	5thYr	1
247	256	11	12	3	100	Bachelors	3rdYr	0
249	273	10	14	5	83	Bachelors	2ndYr	0
250	274	10	15	1	60	Bachelors	5thYr	2+
252	301	9	11	10	71	Bachelors	6thYr+	2+
254	353	7	11	11	40	Bachelors	5thYr	0
255	354	8	12	0	33	Bachelors	3rdYr	0
256	359	11	13	0	10	Bachelors	3rdYr	2+
257	361	8	12	5	40	Bachelors	5thYr	0
258	369	10	8	4	50	Bachelors	5thYr	0
262	435	10	13	6	20	Bachelors	2ndYr	2+
263	439	11	9	5	92	Bachelors	3rdYr	0
264	452	9	11	13	0	Bachelors	6thYr+	0
267	486	9	8	5	53	Bachelors	5thYr	1
268	489	8	14	6	100	Bachelors	2ndYr	0
269	509	10	11	2	80	Bachelors	6thYr+	2+
270	544	11	16	8	55	Bachelors	5thYr	2+
271	52	12	11	0	0	Bachelors	6thYr+	2+
274	46	8	13	1	10	Bachelors	5thYr	2+
276	106	9	12	2	50	Bachelors	3rdYr	0
277	114	9	13	5	83	Bachelors	4thYr	2+
279	216	12	11	7	0	Bachelors	5thYr	1
280	257	9	9	3	20	Bachelors	3rdYr	1
281	265	9	13	1	0	Bachelors	2ndYr	0
282	271	12	9	6	100	Bachelors	4thYr	0
284	378	9	10	1	10	Bachelors	3rdYr	1
285	404	6	11	0	20	Bachelors	4thYr	1
287	453	10	10	5	60	Bachelors	6thYr+	1
288	483	6	8	NA	92	Bachelors	3rdYr	0
289	553	9	13	3	65	Bachelors	6thYr+	2+
292	428	8	8	3	0	Bachelors	2ndYr	0
296	111	6	13	0	50	Bachelors	4thYr	0
300	162	8	9	1	60	Bachelors	4thYr	0
301	169	9	11	3	20	Bachelors	6thYr+	2+
302	185	6	11	0	0	Bachelors	3rdYr	0
303	208	6	10	0	0	Bachelors	4thYr	0
304	219	12	12	4	8	Bachelors	2ndYr	0
305	220	7	11	1	100	Bachelors	2ndYr	0
306	241	8	11	2	40	Bachelors	2ndYr	0
307	259	5	9	0	19	Bachelors	3rdYr	0
309	308	9	13	5	10	Bachelors	3rdYr	1
312	368	10	16	15	20	Bachelors	3rdYr	1
313	383	7	15	13	75	Bachelors	6thYr+	2+
317	530	11	12	9	0	Bachelors	5thYr	2+
318	17	12	10	6	40	Bachelors	5thYr	2+
320	101	9	12	0	0	Bachelors	2ndYr	0
321	116	9	8	4	7	Bachelors	5thYr	1
322	166	7	11	3	70	Bachelors	2ndYr	0
323	201	8	11	0	0	Bachelors	2ndYr	0
324	229	12	10	8	60	Bachelors	5thYr	2+
325	280	7	13	0	0	Bachelors	3rdYr	0
326	296	10	15	4	0	Bachelors	2ndYr	0
327	311	9	13	9	0	Bachelors	3rdYr	0
328	388	11	14	1	0	Bachelors	2ndYr	0
329	494	10	12	7	0	Bachelors	4thYr	2+
330	543	10	13	8	0	Bachelors	2ndYr	0
332	29	9	13	5	10	Bachelors	4thYr	1
334	122	12	14	1	0	Bachelors	5thYr	2+
335	123	10	12	5	50	Bachelors	2ndYr	0
336	136	8	6	1	20	Bachelors	5thYr	0
337	137	10	13	2	20	Bachelors	4thYr	0
339	508	11	7	4	40	Bachelors	5thYr	1
340	432	8	12	1	28	Bachelors	5thYr	2+
341	57	11	11	2	33	Bachelors	3rdYr	0
345	370	10	14	4	30	Bachelors	6thYr+	1
348	502	8	13	6	80	Bachelors	4thYr	0
352	55	9	10	3	0	Masters	3rdYr	2+
353	275	10	12	2	0	Masters	2ndYr	0
354	283	7	8	9	0	Masters	2ndYr	1
355	547	11	NA	13	100	Masters	3rdYr	2+
357	515	7	16	8	50	Masters	4thYr	1
360	51	10	14	3	50	Masters	3rdYr	2+
361	341	8	10	4	10	Masters	5thYr	2+
363	61	11	10	4	0	Masters	3rdYr	1
364	127	10	8	1	15	Masters	5thYr	2+
365	306	10	12	4	94	Masters	4thYr	2+
366	517	11	15	11	70	Masters	3rdYr	2+
368	255	8	8	1	83	Masters	3rdYr	1
370	43	6	6	NA	0	Masters	3rdYr	1
371	108	12	12	5	40	Masters	5thYr	1
373	202	11	10	4	25	Masters	4thYr	1
374	422	8	10	2	100	Masters	4thYr	2+
375	183	9	7	2	40	Masters	2ndYr	1
376	293	9	13	3	0	Masters	6thYr+	2+
377	173	6	7	6	36	Masters	5thYr	2+
379	473	7	8	0	0	Masters	3rdYr	0
380	470	12	11	4	0	Masters	4thYr	0
381	531	11	12	4	50	Masters	2ndYr	0
382	551	9	9	5	30	Masters	3rdYr	1
383	290	7	10	8	20	Masters	3rdYr	1
384	327	7	10	10	0	Masters	5thYr	1
392	30	7	4	1	15	Masters	5thYr	0
393	60	10	16	2	0	Masters	3rdYr	2+
394	533	11	14	12	0	Masters	4thYr	0
395	534	8	10	2	10	Masters	4thYr	2+
396	555	9	7	3	91	Masters	6thYr+	0
398	141	11	12	1	30	Masters	3rdYr	0
399	261	8	16	2	80	Masters	2ndYr	0
400	262	7	13	0	0	Masters	2ndYr	0
402	310	12	15	5	50	Masters	6thYr+	2+
403	325	10	8	5	85	Masters	4thYr	0
404	474	12	11	4	80	Masters	2ndYr	1
405	15	8	12	0	4	Masters	5thYr	0
406	64	6	10	2	7	Masters	3rdYr	0
407	148	11	12	0	0	Masters	3rdYr	1
408	160	8	12	0	20	Masters	6thYr+	1
409	165	11	10	0	0	Masters	4thYr	1
410	179	9	9	1	60	Masters	5thYr	0
411	226	9	8	1	50	Masters	4thYr	0
412	230	11	11	6	50	Masters	4thYr	0
413	304	8	11	4	51	Masters	3rdYr	1
415	338	9	8	3	60	Masters	3rdYr	0
416	352	7	8	2	30	Masters	2ndYr	2+
417	358	11	13	4	51	Masters	6thYr+	0
420	496	10	12	6	31	Masters	3rdYr	1
423	557	12	12	6	40	Masters	5thYr	0
424	221	11	13	NA	95	Masters	2ndYr	0
426	433	8	16	6	5	Masters	2ndYr	0
427	222	9	8	0	0	Masters	2ndYr	1
428	232	9	10	0	50	Masters	3rdYr	2+
429	268	10	10	4	100	Masters	2ndYr	0
430	366	12	9	2	100	Masters	3rdYr	0
432	151	9	9	0	0	Masters	3rdYr	1
433	514	12	16	6	45	Masters	5thYr	0
434	6	9	12	1	76	Masters	5thYr	1
435	13	7	11	4	56	Masters	4thYr	1
436	24	11	12	1	90	Masters	2ndYr	0
437	26	8	7	1	15	Masters	3rdYr	2+
438	87	9	12	2	40	Masters	6thYr+	1
439	99	7	7	1	80	Masters	6thYr+	0
440	109	9	10	6	91	Masters	2ndYr	0
441	142	12	16	3	9	Masters	3rdYr	2+
442	193	12	15	4	100	Masters	6thYr+	2+
444	239	10	12	5	12	Masters	5thYr	1
445	240	8	10	1	24	Masters	2ndYr	0
446	243	12	14	4	16	Masters	6thYr+	0
447	246	9	13	1	0	Masters	4thYr	2+
448	260	8	9	0	60	Masters	6thYr+	0
449	266	10	8	4	0	Masters	5thYr	1
451	294	6	8	7	19	Masters	3rdYr	1
452	322	9	11	5	25	Masters	5thYr	2+
453	323	10	8	5	92	Masters	2ndYr	0
455	380	12	12	9	60	Masters	5thYr	2+
456	386	12	15	5	50	Masters	5thYr	1
458	421	6	7	10	0	Masters	2ndYr	0
459	425	12	12	7	10	Masters	3rdYr	0
461	444	9	9	4	0	Masters	2ndYr	0
463	499	8	10	2	70	Masters	3rdYr	0
464	525	9	NA	0	0	Masters	5thYr	1
465	526	9	15	14	95	Masters	4thYr	0
468	538	11	13	11	80	Masters	5thYr	0
469	549	12	16	3	31	Masters	2ndYr	2+
470	554	10	11	6	5	Masters	6thYr+	2+
471	558	9	13	12	80	Masters	6thYr+	2+
472	215	12	11	11	7	Masters	4thYr	0
474	74	9	10	NA	0	Masters	4thYr	0
475	443	9	12	4	92	Masters	2ndYr	0
476	505	9	13	4	50	Masters	6thYr+	1
477	22	11	15	7	25	Masters	3rdYr	0
478	33	11	12	0	95	Masters	5thYr	0
479	120	7	10	2	15	Masters	5thYr	2+
480	157	12	15	NA	23	Masters	5thYr	2+
481	172	8	16	4	50	Masters	2ndYr	0
483	192	9	13	1	75	Masters	3rdYr	2+
484	206	9	13	10	70	Masters	6thYr+	0
485	254	9	10	1	52	Masters	6thYr+	2+
486	286	6	11	0	60	Masters	4thYr	2+
487	299	12	16	3	40	Masters	4thYr	2+
488	318	12	15	6	40	Masters	4thYr	2+
489	343	9	15	6	89	Masters	3rdYr	1
490	347	5	9	4	75	Masters	6thYr+	2+
491	381	12	16	2	71	Masters	6thYr+	2+
492	393	11	13	0	33	Masters	5thYr	2+
493	403	9	13	4	80	Masters	5thYr	2+
495	442	12	12	NA	0	Masters	2ndYr	2+
496	448	11	15	9	30	Masters	5thYr	2+
497	475	10	11	5	50	Masters	4thYr	2+
498	506	12	15	11	60	Masters	6thYr+	1
499	513	12	9	3	25	Masters	6thYr+	2+
500	520	8	12	1	35	Masters	6thYr+	1
501	28	12	8	2	48	Masters	5thYr	2+
503	89	10	10	1	71	Masters	4thYr	2+
504	92	10	16	3	90	Masters	6thYr+	1
505	115	12	15	2	13	Masters	6thYr+	0
506	134	7	12	10	9	Masters	4thYr	0
508	339	9	10	4	0	Masters	3rdYr	0
510	467	9	12	4	40	Masters	6thYr+	0
511	511	9	16	3	30	Masters	6thYr+	0
513	305	12	16	2	20	Masters	3rdYr	2+
514	317	11	10	3	8	Masters	5thYr	0
515	351	8	12	0	30	Masters	3rdYr	1
516	405	6	NA	5	0	Masters	2ndYr	0
517	450	8	14	8	82	Masters	2ndYr	0
519	529	10	11	2	0	Masters	3rdYr	1
520	75	6	8	8	40	Masters	3rdYr	0
521	128	12	14	1	51	Masters	2ndYr	2+
522	437	12	12	8	0	Masters	6thYr+	1
525	177	11	9	NA	66	Masters	4thYr	2+
526	178	8	11	1	100	Masters	4thYr	1
527	184	9	11	3	20	Masters	3rdYr	1
528	312	10	11	15	80	Masters	3rdYr	2+
529	313	10	13	7	100	Masters	5thYr	2+
530	371	10	11	9	50	Masters	3rdYr	0
531	501	10	9	NA	61	Masters	5thYr	2+
532	503	9	11	12	100	Masters	4thYr	0
534	1	8	16	0	0	Masters	3rdYr	2+
537	73	9	13	5	25	Masters	3rdYr	2+
540	195	9	13	0	0	Masters	3rdYr	2+
541	468	7	8	4	50	Masters	2ndYr	0
